# Supplementary material for: Complete Plastid Genome of the Recent Holoparasite Lathraea squamaria Reveals Earliest Stages of Plastome Reduction in Orobanchaceae
Source: PubMed Central journal article supplement (PMC4775063; doi:10.1371/journal.pone.0150718), 2016-03-02
Supplement: pone.0150718.s001.pdf [file pone.0150718.s001.pdf]

# S1 Appendix. Alignment of some plastid sequences and minor sequences of *Lathraea*.

*rbcL*, *ndhA*, *ndhJ*, *ndhB*, *psaA*, *psaB* and *ycf2*

***rbcL***

|                                  | 10                                                                                                                      | 20                                                                                                                     | 30                                                                              | 40 | 50 | 60 | 70 | 80 | 90 | 100 | 110 | 120 |
|----------------------------------|-------------------------------------------------------------------------------------------------------------------------|------------------------------------------------------------------------------------------------------------------------|---------------------------------------------------------------------------------|----|----|----|----|----|----|-----|-----|-----|
| <i>L.squamaria</i> minor variant | .... .... .... .... .... .... .... .... .... .... .... .... .... ....                                                   | ATGTCACCCACAAACAGAGACTAAAGCAAGTGTGGATTCAAAGCGGgTGTAAAGAGTACAAATTGACTTATTATACTCCTGAATACGAAACAAAAGATACTGATATCTTGGCAGCATT | M S P Q T E T K A S V G F K A G V K E Y K L T Y Y T P E Y E T K D T D I L A A F |    |    |    |    |    |    |     |     |     |
| <i>Lathraea squamaria</i>        | ATGTCACCCACAAACAGAGACTAAAGCAAGTGTGGATTCAAAGCGGATGTTAAAGAGTACAAATTGACTTATTATACTCCTGAATACGAAACAAAAGATACTGATATCTTGGCAGCATT | M S P Q T E T K A S V G F K A G V K E Y K L T Y Y T P E Y E T K D T D I L A A F                                        |                                                                                 |    |    |    |    |    |    |     |     |     |
| <i>Bartsia inaequalis</i>        | ATGTCACCCACAAACAGAGACTAAAGCAAGTGTGGATTCAAAGCGGgTGTAAAGAGTACAAATTGACTTATTATACTCCGGAATACGAAACAAAAGATACTGATATCTTGGCAGCATT  | M S P Q T E T K A S V G F K A G V K E Y K L T Y Y T P E Y E T K D T D I L A A F                                        |                                                                                 |    |    |    |    |    |    |     |     |     |

  

|                                  | 130                                                                                                                      | 140                                                                                                                       | 150                                                                             | 160 | 170 | 180 | 190 | 200 | 210 | 220 | 230 | 240 |
|----------------------------------|--------------------------------------------------------------------------------------------------------------------------|---------------------------------------------------------------------------------------------------------------------------|---------------------------------------------------------------------------------|-----|-----|-----|-----|-----|-----|-----|-----|-----|
| <i>L.squamaria</i> minor variant | .... .... .... .... .... .... .... .... .... .... .... .... .... ....                                                    | cGAGTAACTCCTCAACCTGGAGTTCGCCCTGaaGAAGCaGGGGCTGCAGTCGCTGCCGAATCTTCGACTGGTACATGGACAACCTGTGTGGACCGATGGACTTACCAGCCTTGATCGTTAC | R V T P Q P G V P P E E A G A A V A A E S S T G T W T T V W T D G L T S L D R Y |     |     |     |     |     |     |     |     |     |
| <i>Lathraea squamaria</i>        | TGAGTAACTCCTCAACCTGGAGTTCGCCCTGAGGAAGCGGGCTGCAGTCGCTGCCGAATCTTCGACTGGTACATGGACAACCTGTGTGGACCGATGGACTTACTAGCCTTGATCGTTAC  | * V T P Q P G V P P E E A G A A V A A E S S T G T W T T V W T D G L T S L D R Y                                           |                                                                                 |     |     |     |     |     |     |     |     |     |
| <i>Bartsia inaequalis</i>        | CGAGTAACTCCTCAACCTGGAGTTCGCCCTGAAGCAAGCGGGCTGCAGTCGCTGCCGAATCTTCTACTGGTACATGGACAACCTGTGTGGACCGATGGACTTACCAGCCTTGATCGTTAC | R V S P Q P G V P P E E A G A A V A A E S S T G T W T T V W T D G L T S L D R Y                                           |                                                                                 |     |     |     |     |     |     |     |     |     |

  

|                                  | 250                                                                                                                      | 260                                                                                                                      | 270                                                                             | 280 | 290 | 300 | 310 | 320 | 330 | 340 | 350 | 360 |
|----------------------------------|--------------------------------------------------------------------------------------------------------------------------|--------------------------------------------------------------------------------------------------------------------------|---------------------------------------------------------------------------------|-----|-----|-----|-----|-----|-----|-----|-----|-----|
| <i>L.squamaria</i> minor variant | .... .... .... .... .... .... .... .... .... .... .... .... .... ....                                                    | AAAGGACGATGCTACCACATcGAGCCTGTTCCTGGAGAAACAGATCAATATcTCTGTTATGTAGCTTACCCTTTAGACCTTTTTGAAGAAGGTTCTGTTACTAACATGTTTACTTCCATT | K G R C Y H I E P V P G E T D Q Y I C Y V A Y P L D L F E E G S V T N M F T S I |     |     |     |     |     |     |     |     |     |
| <i>Lathraea squamaria</i>        | AAAGGACGATGCTACCACATTTAGCCTGTTCCTGGAGAAACAGATCAATACATCTGTTATGTAGCTTACCCTTTAGACCTTTTTGAAGAAGGTTCTGTTACTAACATGTTTACTTCCATT | K G R C Y H I E P V P G E T D Q Y I C Y V A Y P L D L F E E G S V T N M F T S I                                          |                                                                                 |     |     |     |     |     |     |     |     |     |
| <i>Bartsia inaequalis</i>        | AAAGGACGATGCTACCACATCGAGCCTGTTCCTGGAGAAACAGATCAATATATCTGTTATGTAGCTTACCCTTTAGACCTTTTTGAAGAAGGTTCTGTTACTAACATGTTTACTTCCATT | K G R C Y H I E P V P G E T D Q Y I C Y V A Y P L D L F E E G S V T N M F T S I                                          |                                                                                 |     |     |     |     |     |     |     |     |     |

  

|                                  | 370                                                                                                                    | 380                                                                                                                    | 390                                                                             | 400 | 410 | 420 | 430 | 440 | 450 | 460 | 470 | 480 |
|----------------------------------|------------------------------------------------------------------------------------------------------------------------|------------------------------------------------------------------------------------------------------------------------|---------------------------------------------------------------------------------|-----|-----|-----|-----|-----|-----|-----|-----|-----|
| <i>L.squamaria</i> minor variant | .... .... .... .... .... .... .... .... .... .... .... .... .... ....                                                  | GTAGGAAACGTATTTGGATTCAAAGCCCTGCGTGCCTACGCTCTGGAAGATCTCGAATCCCCCTGCTTATATTTAAACTTTTCCAAGGACCCCTCACGGGATCCAAGTTGAGAGAGAT | V G N V F G F K A L R A L R L E D L R I P P A Y I K T F Q G P P H G I Q V E R D |     |     |     |     |     |     |     |     |     |
| <i>Lathraea squamaria</i>        | GTAGGAAACGTATTTGGATTCAAAGCCCTGCGTGCCTACGCTCTGGAAGATCTCGAATCCCCCTGCTTATATTTAAACTTTTCCAAGGACCCCTCACGGGATCCAAGTTGAGAGAGAT | V G N V F G F K A L R A L R L E D L R I S P A Y I K T F Q G P P H G I Q V E R D                                        |                                                                                 |     |     |     |     |     |     |     |     |     |
| <i>Bartsia inaequalis</i>        | GTAGGAAACGTATTTGGATTCAAAGCCCTGCGTGCCTACGCTCTGGAAGATCTCGAATCCCCCTGCTTATATTTAAACTTTTCCAAGGACCCCTCACGGGATCCAAGTTGAGAGAGAT | V G N V F G F K A L R A L R L E D L R I P P A Y I K T F Q G P P H G I Q V E R D                                        |                                                                                 |     |     |     |     |     |     |     |     |     |

  

|                                  | 490                                                                                                                   | 500                                                                                                                   | 510                                                                             | 520 | 530 | 540 | 550 | 560 | 570 | 580 | 590 | 600 |
|----------------------------------|-----------------------------------------------------------------------------------------------------------------------|-----------------------------------------------------------------------------------------------------------------------|---------------------------------------------------------------------------------|-----|-----|-----|-----|-----|-----|-----|-----|-----|
| <i>L.squamaria</i> minor variant | .... .... .... .... .... .... .... .... .... .... .... .... .... ....                                                 | AAATTGAACAAGTATGGTCGTCCTGTTGGGATGTACTATTAAACCTAAATTGGGGTTATCTGCTAAAAACTATGGTAGAGCAGTTTATGAATGCTTCGCGGTGGACTTGATTTTACC | K L N K Y G R P L L G C T I K P K L G L S A K N Y G R A V Y E C L R G G L D F T |     |     |     |     |     |     |     |     |     |
| <i>Lathraea squamaria</i>        | AAATTGAACAAGTATGGTCGTCCTGTTGGGATGTACTATTAAACCTAAATTGGGGTTATCTGCTAAAAACTATGGTAGAGCAGTTTATGAATGCTTCGCGGTGGACTTGATTTTACC | K L N K Y G R P L L G C T I K P K L G L S A K N Y G R A V Y E C L R G G L D F T                                       |                                                                                 |     |     |     |     |     |     |     |     |     |
| <i>Bartsia inaequalis</i>        | AAATTGAACAAGTATGGTCGTCCTGTTGGGATGTACTATTAAACCTAAATTGGGGTTATCTGCTAAAAACTATGGTAGAGCAGTTTATGAATGCTTCGCGGTGGACTTGATTTTACC | K L N K Y G R P L L G C T I K P K L G L S A K N Y G R A V Y E C L R G G L D F T                                       |                                                                                 |     |     |     |     |     |     |     |     |     |

  

|                                  | 610                                                                   | 620                                                                                                                    | 630                                                                             | 640 | 650 | 660 | 670 | 680 | 690 | 700 | 710 | 720 |
|----------------------------------|-----------------------------------------------------------------------|------------------------------------------------------------------------------------------------------------------------|---------------------------------------------------------------------------------|-----|-----|-----|-----|-----|-----|-----|-----|-----|
| <i>L.squamaria</i> minor variant | .... .... .... .... .... .... .... .... .... .... .... .... .... .... | AAAGATGATGAGAACGTGAACCTCCAGCCATTTATGCGTTGGAGAGATCGTTTCTTATTTTGTGCCGAAGCAATTTATAAAGCACAGGCTGAACAGGCGAAATAAAGGTCATTACTTG | K D D E N V N S Q P F M R W R D R F L F C A E A I Y K A Q A E T G E I K G H Y L |     |     |     |     |     |     |     |     |     |



**ndhA**

```

10      20      30      40      50      60      70      80      90      100     110     120
Lindenbergia philippensis  ....|....|....|....|....|....|....|....|....|....|....|....|....|....|....|....|
ATGATAATTGATACAACAGAAATACAAGCTATCAATTCTTTTTCTAGATTGGAATCCTTA-----AAAGAAGTTTACGGAAATGATGGATGCTTGGCCCTATTTTAACTCTTGATTAA
M I I D T T E I Q A I N S F S R L E S L K E V Y G M I W M L G P I L T L V L
Bartsia inaequalis        ATGATAATGGATACAATAGAAATACAAGCTATCAATTCTTTTTCCGGATTGGAATCCTTAAACTTAAAGAAGTCTATGGAATTATATGGCTTTTAGCCCCGATTTTAAACGCTTGATTAA
M I M D T I E I Q A I N S F S G L E S L N L K E V Y G I I W L F S P I L T L V L
Lathraea squamaria        ATGATAATGTATACAATAGAAATACAAGCTATCAATTCTTTTTCCGGATTGGAATCCTTA-----AAAGAAGTCTATGGTATTATATGGATGTTTATCCCTATTTTAAACGCTTGATTAA
M I M Y T I E I Q A I N S F S G L E S L K E V Y G I I W M F I P I L T L V L

130     140     150     160     170     180     190     200     210     220     230     240
Lindenbergia philippensis  ....|....|....|....|....|....|....|....|....|....|....|....|....|....|....|....|
GGAATCACACTAGGTGTACTAGTAATTGTTTGGTTAGAAAGAGAAATATCTGCAGGGATACAACAACGTATTGGACCTGAATACGCCGGGCCCTTTGGGACTTCTGCAAGCTTAGCAGAT
G I T L G V L V I V W L E R E I S A G I Q Q R I G P E Y A G P L G L L Q A L A D
Bartsia inaequalis        GGAATTACACTAGGCGTATTAGTAATTGTTTGGTTAGAAAGAGAAATATCTGCAGGGATACAACAACGTATTGGACCCGAATACGCCGGGCCCTTTGGGAATTCTACAAGCTATAGCAGAC
G I T L G V L V I V W L E R E I S A A I Q Q R I G P E Y A G P L G I L Q A I A D
Lathraea squamaria        GGAATCACACTAGGCTTATTAGTAATTGTTTGGTTAGAAAGAGAAATATCTGCAGGGATACAACAACGTATTGGACCCGAATA-GCCGGGCCCTTTGGGAATTCTGCAAGCTATAGCAGAC
G I T L G L L V I V W L E R E I S A A I Q Q R I G P E * P G L W E F C K L * Q T

250     260     270     280     290     300     310     320     330     340     350     360
Lindenbergia philippensis  ....|....|....|....|....|....|....|....|....|....|....|....|....|....|....|....|
GGTACAAAACACTTTTTC---AAAGAGAATCTTCTTCCATCTAGAGGAGATACTCGTTTATTAGTATCGGACCATCCATAGCAGTCATATCAATTTTACTAAGTTATTTCAGTAATTCCT
G T K L L F K E N L L P S R G D T R L F S I G P S I A V I S I L L S Y S V I P
Bartsia inaequalis        GGTACAAAACACTTTTTC---AAAGAAAATCTTCTTCCGTCTAGAGGGGATATTCGTTTATTAGCAGTATCGGACCATCCATAGCAGTCATATCAATTTTACTAATTTTATTAGTAATTCCT
G T K L L F K E N L L P S R G D I R L F S I G P S I A V I S I L L T Y L V I P
Lathraea squamaria        GGTACAAAACACTTTTAT---CAAAGAGAATCTTCTTCCGTCTAGAGGAGATAATTCGTTTATTAGTATCGGACCATCCATAGCAGTCATATCAATTTTACTAATTTTATTAGTAATTCCT
V Q N Y F I K E N L L P S R G D I R L F S I G P S I A V I S I L L T Y L V I P

370     380     390     400     410     420     430     440     450     460     470     480
Lindenbergia philippensis  ....|....|....|....|....|....|....|....|....|....|....|....|....|....|....|....|
TTTAGCTATCGCTTTATTCTAGCTGATCTTAGTATTGGTATTTTTTATGGATTGCCGTTTCAAGCCCTTGCTCCCGTTGGACTTCTTATGTCGGGGTATGGATCAAAATAAATAAATTTCC
F S Y R F I L A D L S I G I F L W I A V S S L A P V G L L M S G Y G S N N K Y S
Bartsia inaequalis        TTTAGCCATCGCTTTATTCTAGCTGATCTTAGTATTGGTATTTTTTATGGATTGCCGTTTCCAGCCCTTGCTCCCGTTGGACTTCTTATGTCGGGATATGGCTCAAAATAAATAAATTTCC
F S H R F I L A D L S I G I F L W I A V S S L A P V G L L M S G Y G S N N K Y S
Lathraea squamaria        TTTAGCTATCGCTTTATTCTAGCTTATCTTAGTATTGGTATTTTTTATGGATTGCCGTTTCCAGTCTTGCTCCCGTTGGACTTCTTATGTCAGGATATGGCTCAAAATAAATAA-----
F S Y R F I L A Y L S I G I F I W I A V S S L A P V G L L M S G Y G S N N K

490     500     510     520     530     540     550     560     570     580     590     600
Lindenbergia philippensis  ....|....|....|....|....|....|....|....|....|....|....|....|....|....|....|....|
TTTTAGGTGGATTAAGGGCTGCTCAATCAATTAGTTATGAAATACCATTAACTCTATGTGATTATCAATATCTCTACTATCTAACAGTTTAAGTACAGTTGATATAGTTGAAGTG
F T L G G L R A A Q S I S Y E I P L T L C V L S I S L L S N S L S T V D I V E V
Bartsia inaequalis        TTTTAGGTGGATTAAGGGCTGCTCAATCAATTAGTTATGAAATACCATTAACTCTATGTGATTATCAATATCTCTACTATCTAACAGTTTAAGTACAGTTGATATAGTTGAAGCG
F T L G G L R A A Q S I S Y E I P L T L C V L S I S L L S N S L S T V D I V E A
Lathraea squamaria        ---TTAGGTGGATTAAGGGCTGCTCAATCAATTAGTTATGAAATACCATTAACTCTATGTGATTATCAATATCTCTACTATCTAACAGTTTAAGTACAGTTGATATAGTTGAAGCG
L G G L R V A A Q S I S Y E I P L T L C V L S I S L L S N S L S T V D I V E A

610     620     630     640     650     660     670     680     690     700     710     720
Lindenbergia philippensis  ....|....|....|....|....|....|....|....|....|....|....|....|....|....|....|....|
CAGTCAAAAATATGGTTTTATGGGGTGGAAATTTCTGGCTCAACCTATAGGGTTTATTGTTTTCTAATTTCTTCTAGCCGAGTGTGAGAGATTACCTTTTGTATTTACCAGAAGCAGAA
Q S K Y G L W G W N F W R Q P I G F I V F L I S S L A E C E R L P F D L P E A E
Bartsia inaequalis        CAGTCAAAAATATGGTTTTATGGGGTGGAAATTTATGGGCCCAACCCATAGGGTTTATCGTTTTTCTAATTTCTTCTAGCCGAGTGTGAGAGATTGCCTTTTGATTTACCAGAAGCAGAA
Q S K Y G F W G W N L W R Q P I G F I V F L I S S L A E C E R L P F D L P E A E
Lathraea squamaria        CAGTCAAAAATATGGTTTTATGGGGTGGAAATTTATGGGCCCAACCTGTAAGGTTTATCGTTTTTCTAATTTCTTCTAGCCGAGTGTGAGAGATTGCCTTTTGATTTACCAGAAGCAGAA
Q S K Y G F W G W N L W R Q P V R F I V F L I S S L A E C E R L P F D L P E A E
```





E E P M I S F S G N F Q T N N F N E I F Q F L I L L C S T L C I P L S V E Y I E

370 380 390 400 410 420 430 440 450 460 470 480  
*L.squamaria minor\_sequence* TGTACAGAAATGGCTATAACAGAGTTTCTCTTATTCTGTTAATACAGCTACTCTAGGAGGAATGTTTTTATGCGGTGCTAACGATTTAATAACTATCTTTGTAGCTCCAGAATGTTTCAGT  
V Q K W L \* Q S F S Y S Y \* Q L L \* E E C F Y A V L T I \* \* L S L \* L Q N V S V

*Lathraea squamaria* TGTACAGAAATGGCTATAACAGAGTTTCTCTTATTCTGTTAATACAGCTACTCTAGGAGGAATGTTTTTATGCGGTGCTAACGATTTAATAACTATCTTTGTAGCTCCAGAATGTTTCAGT  
C T E M A I T E F L L F V L T A T L G G M F L C G A N D L I T I F V A P E C F S

*Bartsia inaequalis* TGTACAGAAATGGCTATAACAGAGTTTCTCTTATTCTGTTAATACAGCTACTCTAGGAGGAATGTTTTTATGCGGTGCTAACGATTTAATAACTATCTTTGTAGCTCCAGAATGTTTCAGT  
C T E M A I T E F L L F V L T A T L G G M F L C G A N D L I T I F V A P E C F S

490 500 510 520 530 540 550 560 570 580 590 600  
*L.squamaria minor\_sequence* TTATGC---TCCTACCTATTATCTGGATATACCAAGAAAGATGTACGGTCTAATGAGGCTACTATGAAATATTTACTCATGGGTGGGGCAAGCTCTTCTATTCTGGTTCATGGTTCTCT  
Y A P T Y Y L D I P R K M Y G L M R L L \* N I Y S W V G Q A L L F W F M V S L

*Lathraea squamaria* TTATGG---TCCTACCTATTATCTGGATATACCAAGAAAGATGTACGGTCTAATGAGGCTACTATGAAATATTTACTCATGGGTGGGGCAAGCTCTTCTATTCTGGTTCATGGTTCTCT  
L W L L P I I W I Y Q E R C T V \* \* G Y Y E I F T H G W G K L F Y S G S W F L

*Bartsia inaequalis* TTATGC---TCCTACCTATTATCTGGATATACCAAGAAAGATGTACGGTCTAATGAGGCTACTATGAAATATTTACTCATGGGTGGGGCAAGCTCTTCTATTCTGGTTCATGGTTCTCT  
L C S Y L L S G Y T K K D V R S N E A T M K Y L L M G G A S S S I L V H G F S

610 620 630 640 650 660 670 680 690 700 710 720  
*L.squamaria minor\_sequence* TGGCTATATGGTTTATCCGGGGGAGAGATCGAGCTTCAAGAAATAGTGAATGGTCTTATCAATACCAAATGTATAACTCCCCAGGAATTTCAATTGCGCTCATATTCATCACTGTAGGA  
G Y M V Y P G E R S S F K K \* \* M V L S I H K C I T P Q E F Q L R S Y S S L \* E

*Lathraea squamaria* TGGCTATATGGTTTATCCGGGGGAGAGATCGAGCTTCAAGAAATAGTGAATGGTCTTATCAATACCAAATGTATAACTCCCCAGGAATTTCAATTGCGCTCATATTCATCACTGTAGGA  
L A I W F I R G R D R A S R N S E W S Y Q Y T N V \* L P R N F N C A H I H C R

*Bartsia inaequalis* TGGCTATATGGTTTATCCGGGGGAGAGATCGAGCTTCAAGAAATAGTGAATGGTCTTATCAATACCAAATGTATAACTCCCCAGGAATTTCAATTGCGCTCATATTCATCACTGTAGGA  
W L Y G L S G G E I E L Q E I V N G L I N T Q M Y N S P G I S I A L I F I T V G

730 740 750 760 770 780 790 800 810 820 830 840  
*L.squamaria minor\_sequence* ATTGGGTTCAAGCTTTCCCGAGCCCTTCTCAT---GGACTCCTGACGTATACGAAGGAGTGCGGTTTCGTTTCGATAAATTCCTACCTCTCTATCTATCTCTGAGATGTTTGGATTTTTC  
L G S S F P Q P L L M D S \* R I R R

*Lathraea squamaria* ATTGGGTTCAAGCTTTCCCGAGCCCTTCTCATCAATGGACTCCTGACGTATACGAAGGAGTGCGGTTTCGTTTCGATAAATTCCTACCTCTCTATCTATCTCTGAGATGTTTGGATTTTTC  
N W V Q A F P S P F S S M D S \* R I R R

*Bartsia inaequalis* ATTGGGTTCAAGCTTTCCCGAGCCCTTCTCATCAATGGACTCCTGACGTATACGAAGGAGTGCGGTTTCGTTTCGAGAAATTCCTACCTCTCTATCTATCTCTGAGATGTTTGGATTTTTC  
I G F K L S P A P S H Q W T P D V Y E G [ intron sequence

850 860 870 880 890 900 910 920 930 940 950 960  
*L.squamaria minor\_sequence* AAAACTCCACGGACATGCAGAAGAGAAATGCTATCCCCACTCGGACCAAGACAGAACTTTTACTTTGTTCAAATAACAATTAAGGTGAAGCGGGTTCAGGAACGACGAATCTCTTTATGAT  
AAAACCTCCACGGACATGCAGAAGAGAAATGCTATCCCCACTCGGACCAAGACAGAACTTTTACTTTGTTCAAATAACAATTAAGGTGAAGCGGGTTCAGGAACGACGAATCTCTTTATGAT  
AAAACCTCCACGGACATGCAGAAGAGAAATGCTATCCCCACTCGGACCAAGACAGAACTTTTACTTTGTTCAAATAACAATTAAGGTGAAGCGGGTTCAGGAACGACGAATCTCTTTATGAT

*Lathraea squamaria* AAAACTCCACGGACATGCAGAAGAGAAATGCTATCCCCACTCGGACCAAGACAGAACTTTTACTTTGTTCAAATAACAATTAAGGTGAAGCGGGTTCAGGAACGACGAATCTCTTTATGAT  
AAAACCTCCACGGACATGCAGAAGAGAAATGCTATCCCCACTCGGACCAAGACAGAACTTTTACTTTGTTCAAATAACAATTAAGGTGAAGCGGGTTCAGGAACGACGAATCTCTTTATGAT

*Bartsia inaequalis* AAAACTCCACGGACATGCAGAAGAGAAATGCTATCCCCACTCGGACCAAGACAGAACTTTTACTTTGTTCAAATAACAATTAAGGTGAAGCGGGTTCAGGAACGACGAATCTCTTTATGAT  
AAAACCTCCACGGACATGCAGAAGAGAAATGCTATCCCCACTCGGACCAAGACAGAACTTTTACTTTGTTCAAATAACAATTAAGGTGAAGCGGGTTCAGGAACGACGAATCTCTTTATGAT

970 980 990 1000 1010 1020 1030 1040 1050 1060 1070 1080  
*L.squamaria minor\_sequence* AAACAGATCCATTTTTCGAAGTTCGGTTATTACGGGTAGTTCCCTACAAAGGATCGGACTAATGACGTATCCAAATCTTGAATTCCTCGATGTAGATGCTACATAGTTGGTTCTCATCCCTCAG  
AAACAGATCCATTTTTCGAAGTTCGGTTATTACGGGTAGTTCCCTACAAAGGATCGGACTAATGACGTATCCAAATCTTGAATTCCTCGATGTAGATGCTACATAGTTGGTTCTCATCCCTCAG  
AAACAGATCCATTTTTCGAAGTTCGGTTATTACGGGTAGTTCCCTACAAAGGATCGGACTAATGACGTATCCAAATCTTGAATTCCTCGATGTAGATGCTACATAGTTGGTTCTCATCCCTCAG

*Lathraea squamaria* AAACAGATCCATTTTTCGAAGTTCGGTTATTACGGGTAGTTCCCTACAAAGGATCGGACTAATGACGTATCCAAATCTTGAATTCCTCGATGTAGATGCTACATAGTTGGTTCTCATCCCTCAG  
AAACAGATCCATTTTTCGAAGTTCGGTTATTACGGGTAGTTCCCTACAAAGGATCGGACTAATGACGTATCCAAATCTTGAATTCCTCGATGTAGATGCTACATAGTTGGTTCTCATCCCTCAG

*Bartsia inaequalis* AAACAGATCCATTTTTCGAAGTTCGGTTATTACGGGTAGTTCCCTACAAAGGATCGGACTAATGACGTATCCAAATCTTGAATTCCTCGATGTAGATGCTACATAGTTGGTTCTCATCCCTCAG  
AAACAGATCCATTTTTCGAAGTTCGGTTATTACGGGTAGTTCCCTACAAAGGATCGGACTAATGACGTATCCAAATCTTGAATTCCTCGATGTAGATGCTACATAGTTGGTTCTCATCCCTCAG

1090 1100 1110 1120 1130 1140 1150 1160 1170 1180 1190 1200  
*L.squamaria minor\_sequence* AGACTACGAGTGTAAATAGGAGCATCCGTCGACAAAAGGATCACCCTAAGATGATCAATTTTATGGCTATTGAGAACGAATTAATCAGATGGTTCTATTTCTCAATCTTTCTGACTTGCTC  
AGACTACGAGTGTAAATAGGAGCATCCGTCGACAAAAGGATCACCCTAAGATGATCAATTTTATGGCTATTGAGAACGAATTAATCAGATGGTTCTATTTCTCAATCTTTCTGACTTGCTC  
AGACTACGAGTGTAAATAGGAGCATCCGTCGACAAAAGGATCACCCTAAGATGATCAATTTTATGGCTATTGAGAACGAATTAATCAGATGGTTCTATTTCTCAATCTTTCTGACTTGCTC

*Lathraea squamaria* AGACTACGAGTGTAAATAGGAGCATCCGTCGACAAAAGGATCACCCTAAGATGATCAATTTTATGGCTATTGAGAACGAATTAATCAGATGGTTCTATTTCTCAATCTTTCTGACTTGCTC  
AGACTACGAGTGTAAATAGGAGCATCCGTCGACAAAAGGATCACCCTAAGATGATCAATTTTATGGCTATTGAGAACGAATTAATCAGATGGTTCTATTTCTCAATCTTTCTGACTTGCTC

*Bartsia inaequalis* AGACTACGAGTGTAAATAGGAGCATCCGTCGACAAAAGGATCACCCTAAGATGATCAATTTTATGGCTATTGAGAACGAATTAATCAGATGGTTCTATTTCTCAATCTTTCTGACTTGCTC  
AGACTACGAGTGTAAATAGGAGCATCCGTCGACAAAAGGATCACCCTAAGATGATCAATTTTATGGCTATTGAGAACGAATTAATCAGATGGTTCTATTTCTCAATCTTTCTGACTTGCTC

1210 1220 1230 1240 1250 1260 1270 1280 1290 1300 1310 1320

*L.squamaria minor\_sequence* CTACggaaccaagTTCGAAAAGATTGAAAAATCAGTCATTACCAACCCTGATGAAGGATTCCTCGAAAAGTTgAAGGATTAGTAATCTTTTTTAGAAATCGAATGGATTCCGTCCTTATA  
*Lathraea squamaria* CTACCTCGAAAAGATTGAAAAATCAGTCATTACCAACCCTGATGAAGGATTCCTCGAAAAGTTAAGGATTAGTAATCTTTTTTAGAAATCGAATGGATTCCGTCCTTATA  
*Bartsia inaequalis* CTACGGAACCAAGGTCGAAAAGATTGAAAAATCAGTCATTACCAACCCTGATGAAGGATTCCTCGAAAAGTTAAGGATTAGTAATCTTTTTTAGAAATCGAATGGATTCCGTCCTTATA

1330 1340 1350 1360 1370 1380 1390 1400 1410 1420 1430 1440  
*L.squamaria minor\_sequence* CATAACGCGAGGAAGGTAATCAAAAAAGAAAAGAGATGCGTTCTTCTGTCCTTTTATCAGTTAGGAGCCGTGTGAGATGAAAGTCTCATGCACGGTTTTGAATGAGAGAAAAGAGTGGAA  
*Lathraea squamaria* CATAACGCGAGGAAGGTAATCAAAAAAGAAAAGAGATGCGTTCTTCTGTCCTTTTATCAGTTAGGAGCCGTGTGAGATGAAAGGCTCATGCACGGTTTTGAATGAGAGAAAAGAGTGGAA  
*Bartsia inaequalis* CATAACGCGAGGAAGGTAATCAAAAAAGAAAAGAGATGCGTTCTTCTGTCCTTTTATCAGTTAGGAGCCGTGTGAGATGAAAGTCTCATGCACGGTTTTGAATGAGAGAAAAGAGTGGAA

1450 1460 1470 1480 1490 1500 1510 1520 1530 1540 1550 1560  
*L.squamaria minor\_sequence* TCCTCTTTTCGACTCTAAC~TCTCCCACTCCAGTCGTTGCTTTTCTTTCTGTTACTTCGAAAGTAGCTGCTCCAGCTTCAGCCACTCGAATTTTtGATATTCCTTTTATTTCTCATCA  
L S H S S R C F S F C Y F E S S C S S F S H S N F R Y S F L F L I  
*Lathraea squamaria* TCCTCTTTTCGACTCTAAC~TCTCCCACTCCAGTCGTTGCTTTTCTTTCTGTTACTTCGAAAGTAGCTGCTCCAGCTTCAGCCACTCGAATTTTtGATATTCCTTTTATTTCTCATCA  
L S H S S R C F S F C Y F E S S C S S F S H S N F R Y S F L F L I  
*Bartsia inaequalis* TCCTCTTTTCGACTCTGAC~TCTCCCACTCCAGTCGTTGCTTTTCTTTCTGTTACTTCGAAAGTAGCTGCTCCAGCTTCAGCCACTCGAATTTTtGATATTCCTTTTATTTCTCATCA  
intron sequence ] S P T P V V A F L S V T S K V A A P A S A T R I F D I P F Y F S S

1570 1580 1590 1600 1610 1620 1630 1640 1650 1660 1670 1680  
*L.squamaria minor\_sequence* AACGAATGGCATCTTCTTTCGAAAATCCTAGCTATTCTTAGCATGATATTCGAAAATATCATTGCTATTACTCAACAAGCATGAAACGTATGCTTGCATATTCCTCCATAGGTCAAATC  
K R M A S S S G N P S Y S \* H D I R K Y H C Y Y S N K H E T Y A C I F V H R S N  
*Lathraea squamaria* AACGAATGGCATCTTCTTTCGAAAATCCTAGCTATTCTTAGCATGATATTCGAAAATATCATTGCTATTACTCAACAAGCATGAAACGTATGCTTGCATATTCCTCCATAGGTCAAATC  
K R M A S S S G N P S Y S \* H D I R K Y H C Y Y S N K H E T Y A C I F V H R S N  
*Bartsia inaequalis* AACGAATGGCATCTTCTTTCGAAAATCCTAGCTATTCTTAGCATGATATTCGAAAATATCATTGCTATTACTCAACAAGCATGAAACGTATGCTTGCATATTCCTCCATAGGTCAAATA  
N E W H L L L E I L A I L S M I F G N I I A I T Q T S M K R M L A Y S S I G Q I

1690 1700 1710 1720 1730 1740 1750 1760 1770 1780 1790 1800  
*L.squamaria minor\_sequence* GGATATGTAATTATTGGAATAATTGTTGGAGACTCAAAATGATGGATATGCAAGCATGATAACTTATATGCTGTTCTATATCTCCATGAATCTAGGAACCTTTTCTTGCATTGATTATTT  
R I C N Y W N N C W R L K \* W I C K H D N L Y A V L Y L H E S R N F C L H C I I  
*Lathraea squamaria* GGATATGTAATTATTGGAATAATTGTTGGAGACTCAAAATGATGGATATGCAAGCATGATAACTTATATGCTGTTCTATATCTCCATGAATCTAGGAACCTTTTCTTGCATTGATTATTT  
R I C N Y W N N C W R L K \* W I C K H D N L Y A V L Y L H E S R N F C L H C I I  
*Bartsia inaequalis* GGATATGTAATTATTGGAATAATTGTTGGAGACTCAAAATGATGGATATGCAAGCATGATAACTTATATGCTGTTCTATATCTCCATGAATCTAGGAACCTTTTCTTGCATTGATTATTT  
G Y V I I G I I V G D S N D G Y A S M I T Y M L F Y I S M N L G T F A C I V L F

1810 1820 1830 1840 1850 1860 1870 1880 1890 1900 1910 1920  
*L.squamaria minor\_sequence* GGTCTACGTACCGAACTGATAACATTCGAGATTATGCAGGATTATACACGAAAGATCCTTTTTTGGCTCTCTCTTTAGCCCTATGTCCTTATCCCTAGGAGGCTTCTCCCTAGCA  
W S T Y R N \* \* H S R L C R I I H E R S F F G S L F S P M S L I P R R S S S T S  
*Lathraea squamaria* GGTCTACGTACCGAACTGATAACATTCGAGATTATGCAGGATTATACACGAAAGATCCTTTTTTGGCTCTCTCTTTAGCCCTATGTCCTTATCCCTAGGAGGCTTCTCCCTAGCA  
W S T Y R N \* \* H S R L C R I I H E R S F F G S L F S P M S L I P R R S S S T S  
*Bartsia inaequalis* GGTCTACGTACCGAACTGATAACATTCGAGATTATGCAGGATTATACACGAAAGATCCTTTTTTGGCTCTCTCTTTAGCCCTATGTCCTTATCCCTAGGAGGCTTCTCCCTAGCA  
G L R T G T D N I R D Y A G L Y T K D P F L A L S L A L C L L S L G G L P P L A

1930 1940 1950 1960 1970 1980 1990 2000 2010 2020 2030 2040  
*L.squamaria minor\_sequence* GGTTTTTTCGAAAACCTATTTATTCTGGTGTGGATGGCGGGCAGGCGTATATTCCTTGGTTTTAATAGGACTCCTTACAGCGTCTTTCTATCTACTATTATCTAAAAATAATCAAG  
R F F R K T L F I L V W M A G R R I F L G F N R T P Y K R S F Y L L L S K N N Q  
*Lathraea squamaria* GGTTTTTTCGAAAACCTATTTATTCTGGTGTGGATGGCGGGCAGGCGTATATTCCTTGGTTTTAATAGGACTCCTTACAGCGTCTTTCTATCTACTATTATCTAAAAATAATCAAG  
R F F R K T L F I L V W M A G R R I F L G F N R T P Y K R S F Y L L L S K N N Q  
*Bartsia inaequalis* GGTTTTTTCGAAAACCTATTTATTCTGGTGTGGATGGCGGGCAGGCGTATATTCCTTGGTTTTAATAGGACTCCTTACAGCGTCTTTCTATCTACTATTATCTAAAAATAATCAAG  
G F F G K L Y L F W C G W R A G V Y S L V L I G L L T S V L S I Y Y Y L K I I K

2050 2060 2070 2080 2090 2100 2110 2120 2130 2140 2150 2160  
*L.squamaria minor\_sequence* TTATTAATGACTGGACGAAACCAAGAAATCACCCCTCAGTCGCAATTTATAGAAGATCTCCTTTAAGATCAACAATTCATCGAATTGAGTATGATTGTATGTGATAGCATCTACT











*L.squamaria minor* sequence AACGAGCGGcCCGGCATTCAATGCGGGTCGAAGCATCTGGTTGcctggttgGTTAAATGCTATTAATGAAAATACATAATTCATTATTCTTAACAATAGGTCCTGGAGACTTTTTaGTTCA  
T S G P A F N A G R S I W L P G W L N A I N E N T N S L F L T I G P G D F L V H  
*Lathraea squamaria* AACGAGCGGGCCGGCATTCAATGCGGGTCGAAGCATCTGGTTG-----GTTAAATGCTATTAATGAAAATACATAATTCATTATTCTTAACAATAGGTCCTGGAGACTTTTTGGTTCA  
T S G P A F N A G R S I W L V K C Y \* \* K Y \* F I I L N N R S R R L F G S  
*Bartsia inaequalis* AACGAGCGGcCCGGCATTCAATGCGGGTCGAAGCATCTGGTTGcctggttgGTTAAATGCTATTAATGAAAATACATAATTCATTATTCTTAACAATAGGTCCTGGAGACTTTTTAGTTCA  
T S G P A F N A G R S I W L P G W L N A I N E N T N S L F L T I G P G D F L V H

1570 1580 1590 1600 1610 1620 1630 1640 1650 1660 1670 1680  
*L.squamaria minor* sequence TCATGCTATTGCTCTGGGTTTACATACAACCTACATTGATCTTAGTAAAAGGTGCTTTAGATGCACCGGTTCAAAGTTAATGCCAGATAAAAAGGATTTGcgttatAGTTTTCCGTGCGA  
H A I A L G L H T T T L I L V K G A L D A R G S K L M P D K K D F G Y S F P C D  
*Lathraea squamaria* TCATGCTATTGCTCTGGGTTTACATACAACCTACATTGATCTTAGTAAAAGGTGCTTTAGATGCACCGGTTCAAAGTTAATGCCAGATAAAAAGGATTTG-----AGTTTTCCGTGCGA  
S C Y C S G F T Y N Y I D L S K R C F F R C T R F K V N A R \* K G F F Q F S V R  
*Bartsia inaequalis* TCATGCTATTGCTCTGGGTTTACATACAACCTACATTGATCTTAGTAAAAGGTGCTTTAGATGCACCGGTTCAAAGTTAATGCCAGATAAAAAGGATTTGCGTTATAGTTTTCCGTGCGA  
H A I A L G L H T T T L I L V K G A L D A R G S K L M P D K K D F G Y S F P C D

1690 1700 1710 1720 1730 1740 1750 1760 1770 1780 1790 1800  
*L.squamaria minor* sequence TGGCCCGGGACGGGGG-GGTACTTTGTGATATTTCCGGCATGGGATGCATTTTATTTGGCAGTTTTTTGGATGTTAAATACTATTGGATGGGTTACTTTTTATTGGCATTGGAAGCACATCA  
G P G R G G T C D I S A W D A F Y L A V F W M L N T I G W V T F Y W H W K H I  
*Lathraea squamaria* TGGCCCGGGACGGGGGGGTACTTTGTGATATTTCCGGCATGGGATGCATTTTATTTGGCAGTTTTTTGGATGTTAAATACTATTGGATGGGTTACTTTTTATTGGCATTGGAAGCACATCA  
W P G T G V L V I F R H G M H F I W Q F F G C \* I L L D G L F I G I G S T S  
*Bartsia inaequalis* TGGCCCGGGACGGGGG-GGTACTTTGTGATATTTCCGGCATGGGATGCATTTTATTTGGCAGTTTTTTGGATGTTAAATACTATTGGATGGGTTACTTTTTATTGGCATTGGAAGCACATCA  
G P G R G G T C D I S A W D A F Y L A V F W M L N T I G W V T F Y W H W K H I

1810 1820 1830 1840 1850 1860 1870 1880 1890 1900 1910 1920  
*L.squamaria minor* sequence CATTATGGCAGGGTAACGTTTACAGTTTAATGAATCCTCCACTTATTTGATGGGCTGGCTAAGAGATTATTTATgTTAAACTTTCACAACCTatcaatgGATATAACCCTTTTGGTA  
T L W Q G N V S Q F N E S S T Y L M G W L R D Y L W L N S S Q L I N G Y N P F G  
*Lathraea squamaria* CATTATGGCAGGGTAACGTTTACAGTTTAATGAATCCTCCACTTATTTGATGGGCTGGCTAAGAGATTATTTATAGTTAAACTTTCACAACCT-----GATATAACCCTTTTGGTA  
H Y G R V T F H S L M N P P L I \* W A G \* E I I Y S \* T L H N \* Y N P F G  
*Bartsia inaequalis* CATTATGGCAGGGTAACGTTTACAGTTTAATGAATCCTCCACTTATTTGATGGGCTGGCTCAGAGATTATTTATGGTTAAACTTTCACAACCTATCAATGGATATAACCCTTTTGGTA  
T L W Q G N V S Q F N E S S T Y L M G W L R D Y L W L N S S Q L I N G Y N P F G

1930 1940 1950 1960 1970 1980 1990 2000 2010 2020 2030 2040  
*L.squamaria minor* sequence TGAATAGTTTATCGGTCTGGGCGTGGATGTTTTTATTGGACATCTGTTTGGGCTACTGGATTTATGTTCTTAATCTCCTGGCGTGGATATTGGCagGAATTGATTGAAACTTTAGCAT  
M N S L S W A W M F L F G H L V W A T G F M F L I S W R G Y W Q E L I E T L A  
*Lathraea squamaria* TGAATAGTTTATCGGTCTGGGCGGGATGTTTTTATTGGACATCTGTTTGGGCTACTGGATTTATGTTCTTAATCTCCTGGCGGGATATTGGCAAGAATTGATTGAAACTTTAGCAT  
M N S L S V W A R M F L F G H L V W A T G F M F L I S W R G Y W Q E L I E T L A  
*Bartsia inaequalis* TGAATAGTTTATCGGTCTGGGCGTGGATGTTTTTATTGGACATCTGTTTGGGCTACTGGATTTATGTTCTTAATCTCCTGGCGTGGATATTGGCAGGAATTGATTGAAACTTTAGCAT  
M N S L S V W A W M F L F G H L V W A T G F M F L I S W R G Y W Q E L I E T L A

2050 2060 2070 2080 2090 2100 2110 2120 2130 2140 2150 2160  
*L.squamaria minor* sequence GGGCTCATGAACGCACACCTTTGGCCAATTTGATTCGATGGAGAGATAAAA-CCTGTGGCCCTTCCATTGTGCAAGCAAGATTGGTTgATTAGCCCACTTTTCTGTAGGTTATATATTC  
W A H E R T P L A N L I R W R D K P V A L S I V Q A R L V G L A H F S V G Y I F  
*Lathraea squamaria* GGGCTCATGAACGCACACCTTTGGCCAATTTGATTCGATGGAGAGATAAAA-CCTGTGGCCCTTCCATTGTGCAAGCAAGATTGGTTAGATTAGCCCACTTTTCTGTAGGTTATATATTC  
W A H E R T P L A N L I R W R D K T C G P F H C A S K I G \* I S P L F C R L Y I  
*Bartsia inaequalis* GGGCTCATGAACGCACACCTTTGGCCAATTTGATTCGATGGAGAGATAAAA-CCTGTGGCTCTTCCATTGTGCAAGCAAGATTGGTTGGATTAGCTCACTTTTCTGTAGGTTATATATTC  
W A H E R T P L A N L I R W R D K P V A L S I V Q A R L V G L A H F S V G Y I F

2170 2180 2190 2200  
*L.squamaria minor* sequence ACTTATGCAGCTTTCTTGATTGCCTCgACATCGGGAAAATTTGGCTCA  
T Y A A F L I A S T S G K F G S  
*Lathraea squamaria* ACTTATGCAGCTTTCTTGATTGCCTCCACATCGGGAAAATTTGGCTAA  
H L C S F L D C L H I G K I W L

*Bartsia inaequalis*

ACTTATGCAGCTTTCTTGATTGCCTCGACATCGGGAAAATTGGC  
T Y A A F L I A S T S G K F G

ycf2

|                                   |                                                                                 |            |         |        |          |          |         |         |          |         |        |         |         |        |         |         |         |        |       |        |        |       |        |     |
|-----------------------------------|---------------------------------------------------------------------------------|------------|---------|--------|----------|----------|---------|---------|----------|---------|--------|---------|---------|--------|---------|---------|---------|--------|-------|--------|--------|-------|--------|-----|
|                                   | 10                                                                              | 20         | 30      | 40     | 50       | 60       | 70      | 80      | 90       | 100     | 110    | 120     |         |        |         |         |         |        |       |        |        |       |        |     |
| <i>L.squamaria</i> minor sequence | ATGA                                                                            | AAGAACATCC | ATTCAAA | TCCTGG | ATTTTCGA | ATTGAGAG | ATCAAGA | ATTCTCA | TATTTCTT | AGATTTC | ATGGAC | TCAATTC | CAATTC  | CCGTAG | GGTCTTT | CATTCAC | ATTTTTC |        |       |        |        |       |        |     |
| <i>Lathraea squamaria</i>         | M K E H P F K S W I F E L R E I K N S H Y F L D S W T Q F N S V G S F I H I F F |            |         |        |          |          |         |         |          |         |        |         |         |        |         |         |         |        |       |        |        |       |        |     |
| <i>Bartsia inaequalis</i>         | M K E H P F K S W I F E L R E I K N S H Y F L D S W T Q F N S V G S F I H I F F |            |         |        |          |          |         |         |          |         |        |         |         |        |         |         |         |        |       |        |        |       |        |     |
|                                   | 130                                                                             | 140        | 150     | 160    | 170      | 180      | 190     | 200     | 210      | 220     | 230    | 240     |         |        |         |         |         |        |       |        |        |       |        |     |
| <i>L.squamaria</i> minor sequence | CACCA                                                                           | AAGAAC     | TTTTCT  | AAACTC | CTTGAC   | CCCGGA   | ATTTT   | GAGTAT  | CCACTT   | TTCATG  | CAATTC | ACAGGG  | TTCAACA | AGCAAT | CGATAT  | TTTCAC  | GATCA   | AGGGT  | TAATA | CTCTT  | TGTGA  |       |        |     |
| <i>Lathraea squamaria</i>         | H Q E R F L K L L D P R I L S I L L S C N S Q G S T S N R Y F T I K G V I L F V |            |         |        |          |          |         |         |          |         |        |         |         |        |         |         |         |        |       |        |        |       |        |     |
| <i>Bartsia inaequalis</i>         | H Q E R F L K L L D P R I L S I L L S R N S Q G S T S N R Y F T I K G V I L F V |            |         |        |          |          |         |         |          |         |        |         |         |        |         |         |         |        |       |        |        |       |        |     |
|                                   | 250                                                                             | 260        | 270     | 280    | 290      | 300      | 310     | 320     | 330      | 340     | 350    | 360     |         |        |         |         |         |        |       |        |        |       |        |     |
| <i>L.squamaria</i> minor sequence | GTAG                                                                            | CGTCC      | TATATA  | ~~~~~  | TATCG    | TATTAA   | CAATCG  | AAATAT  | GGTCG    | AAAGAAA | AAATCT | CTATT   | GGAGGG  | GGGCTT | CTCCT   | ATGAA   | TTCCAT  | TGGACC | CAGAA | TGATAC | TTGGAA |       |        |     |
| <i>Lathraea squamaria</i>         | V A V L I Y R I N N R N M V E R K N L Y W R G L L P M N S I G P R N D T L E     |            |         |        |          |          |         |         |          |         |        |         |         |        |         |         |         |        |       |        |        |       |        |     |
| <i>Bartsia inaequalis</i>         | V A V L I F I Y R I N N R N M V E R K N L Y W R G L L P M N S I G P R N D T L E |            |         |        |          |          |         |         |          |         |        |         |         |        |         |         |         |        |       |        |        |       |        |     |
|                                   | 370                                                                             | 380        | 390     | 400    | 410      | 420      | 430     | 440     | 450      | 460     | 470    | 480     |         |        |         |         |         |        |       |        |        |       |        |     |
| <i>L.squamaria</i> minor sequence | GAAT                                                                            | CGTTGG     | TCTTCC  | AATAT  | CAATAG   | GTGATT   | GTTTTC  | GCTCCT  | TATCTT   | CCAAA   | AGGAAA | AGATCT  | CGGAG   | AGTTG  | TTTCT   | GAA     | TCCGAA  | AGAG   | TACTT | GGATT  | CTCCCA |       |        |     |
| <i>Lathraea squamaria</i>         | E S V G S S N I N R L I V S L L Y L P K G K K I S E S C F L N P K E S T W I L P |            |         |        |          |          |         |         |          |         |        |         |         |        |         |         |         |        |       |        |        |       |        |     |
| <i>Bartsia inaequalis</i>         | E S V G S S N I N R L I V S L L Y L P K G K K I S E S C F L N P K E S T W I L P |            |         |        |          |          |         |         |          |         |        |         |         |        |         |         |         |        |       |        |        |       |        |     |
|                                   | 490                                                                             | 500        | 510     | 520    | 530      | 540      | 550     | 560     | 570      | 580     | 590    | 600     |         |        |         |         |         |        |       |        |        |       |        |     |
| <i>L.squamaria</i> minor sequence | ATAA                                                                            | CTCAA      | AGTGT   | AGCA   | TGCCT    | GAATC    | TAACT   | GGGGT   | TTCG     | CGGTGG  | TGGAG  | GAAC    | TGGAG   | CGGAAA | AGGAG   | GATTCT  | AGTTG   | TAA    | GATAT | CTAAT  | GAA    | CCGTC | GGAATT | GAG |
| <i>Lathraea squamaria</i>         | I T Q K C S M P E S N W G S R W W R N W S G K R R D S S C K I S N E T V A G I E |            |         |        |          |          |         |         |          |         |        |         |         |        |         |         |         |        |       |        |        |       |        |     |
| <i>Bartsia inaequalis</i>         | I T K K C S M P E S N W G S R W W R N W S G K K R D S S C K I S N E T V A G I E |            |         |        |          |          |         |         |          |         |        |         |         |        |         |         |         |        |       |        |        |       |        |     |
|                                   | 610                                                                             | 620        | 630     | 640    | 650      | 660      | 670     | 680     | 690      | 700     | 710    | 720     |         |        |         |         |         |        |       |        |        |       |        |     |
| <i>L.squamaria</i> minor sequence | ATCT                                                                            | TATCA      | ACGAG   | AAAGAT | TCAAA    | TATCT    | GGAG    | TTTCT   | TTTTG    | TATA    | TATAT  | GGATG   | ATCCG   | ATCCG  | CAAGG   | ACCGT   | GATTGG  | GAATT  | GTTTG | GATTG  | CTTTCT | CTGAG | GAAGG  |     |
| <i>Lathraea squamaria</i>         | I L F N E K D I K Y L E F L F V Y Y M D D P I R K D R D W E L F D C L S L R K R |            |         |        |          |          |         |         |          |         |        |         |         |        |         |         |         |        |       |        |        |       |        |     |
| <i>Bartsia inaequalis</i>         | I L F N E K D I K Y L E F L F V Y Y M D D P I R K D R D W E L F D C L S L R K R |            |         |        |          |          |         |         |          |         |        |         |         |        |         |         |         |        |       |        |        |       |        |     |

*Bartsia inaequalis* .....A.....  
I L F N E K D I K Y L E F I F V Y Y M D D P I R K D R D W E L F D C L S L R K R

730 740 750 760 770 780 790 800 810 820 830 840  
*L.squamaria minor sequence* CGAAATAGAAATCAACTTGAATTCGGGATCGCTATTTCGAAATCTTAGTGAAACACTGGATTCTTATCTCATGCTCTGCTTTTCGTGAAAAAATACCAATTGAAGTGGAGGGTTTCTTCAA  
R N R I N L N S G S L F E I L V K H W I S Y L M S A F R E K I P I E V E G F F K  
*Lathraea squamaria* .....  
R N R I N L N S G S L F E I L V K H W I S Y L M S A F R E K I P I E V E G F F K  
*Bartsia inaequalis* .....  
R N R I N L N S G S L F E I L V K H W I S Y L M S A F R E K I P I E V E G F F K

850 860 870 880 890 900 910 920 930 940 950 960  
*L.squamaria minor sequence* CAACAAGGGCTGGGCAACTATTCAATCAATGATATTGAGCATGTTTCTCATCTTTCGAGAAACAAGTGGCTATTTCTTTGCAAAAATTGCTCAATTTTCATATGTTGGCAATTT  
Q Q R A G S T I Q S N D I E H V S H L F S R N K W A I S L Q N C A Q F H M W Q F  
*Lathraea squamaria* .....  
Q Q R A G S T I Q S N D I E H V S H L F S R N K W A I S L Q N C A Q F H M W Q F  
*Bartsia inaequalis* .....  
Q Q R A G S T I Q S N D I E H V S H L F S R N K W A I S L Q N C A Q F H M W Q F

970 980 990 1000 1010 1020 1030 1040 1050 1060 1070 1080  
*L.squamaria minor sequence* CGCCAGGATCTTTCGTTAGTTGGGGAAGAATCCGCACGAATCGGATTTTTGAGGAACATATCGAGAGAGATTGATTGTTAGACAATGTGTGGTTGGTAAACAAGGATCCGTTT  
R Q D L F V S W G K N P H E S D F L R N I S R E N L I W L D N V W L V N K D P F  
*Lathraea squamaria* .....  
R Q D L F V S W G K N P H E S D F L R N I S R E N L I W L D N V W L V N K D P F  
*Bartsia inaequalis* .....  
R Q D L F V S W G K N P H E S D F L R N I S R E N L I W L D N V W L V N K D P F

1090 1100 1110 1120 1130 1140 1150 1160 1170 1180 1190 1200  
*L.squamaria minor sequence* TTTAGAAAGGTACCGAATGTATCGTCAAAATATTCAATATGATTCCACAAGATCCAGTTTCGTTCAAGTAACGGATTCTAGCCAACCGAAAGGATCTTCTGATCAATCCAGAGATCATTG  
F R K V R N V S S N I Q Y D S T R S S F V Q V T D S S Q P K G S S D Q S R D H L  
*Lathraea squamaria* .....  
F R K V R N V S S N I Q Y D S T R S S F V Q V T D S S Q P K G S S D Q S R D H L  
*Bartsia inaequalis* .....T.....  
F R K V R N V S S Y I Q Y D S T R S S F V Q V T D S S Q P K G S S D Q S R D H L

1210 1220 1230 1240 1250 1260 1270 1280 1290 1300 1310 1320  
*L.squamaria minor sequence* GATTCCATTAGTAATGAGGATTCCGGAATATCACACATTGATCAATCAAAGAGAGATTCAACCCTAAAAGAAAGATCGATTCTTTGGGATCCTTCTTCTTCAAACCGAAGGAACAGAG  
D S I S N E D S E Y H T L I N Q R E I Q P L K E R S I L W D P S F L Q T E G T E  
*Lathraea squamaria* .....  
D S I S N E D S E Y H T L I N Q R E I Q P L K E R S I L W D P S F L Q T E G T E  
*Bartsia inaequalis* .....G.....  
D S I S N E D S E Y H A L I N Q R E I Q P L K E R S I L W D P S F L Q T E G T E

1330 1340 1350 1360 1370 1380 1390 1400 1410 1420 1430 1440  
*L.squamaria minor sequence* ATAGAAATCCGACCGAATCCCGAAATCCCTTTCTGGATATTCCCTCAATGTCCCGGCTATTCCAGGAACTGAGAAGCAGATGATTAATCATCTGCTTCCGGAAGAAATCGAAGAAATTTCTT  
I E S D R F P K S L S G Y S S M S R L F T E R E K Q M I N H L L P E E I E E F L  
*Lathraea squamaria* .....  
I E S D R F P K S L S G Y S S M S R L F T E R E K Q M I N H L L P E E I E E F L  
*Bartsia inaequalis* .....  
I E S D R F P K S L S G Y S S M S R L F T E R E K Q M I N H L L P E E I E E F L

1450 1460 1470 1480 1490 1500 1510 1520 1530 1540 1550 1560







|                                   |                                                                                                                           |      |      |      |      |      |      |      |      |      |      |      |
|-----------------------------------|---------------------------------------------------------------------------------------------------------------------------|------|------|------|------|------|------|------|------|------|------|------|
|                                   | 3010                                                                                                                      | 3020 | 3030 | 3040 | 3050 | 3060 | 3070 | 3080 | 3090 | 3100 | 3110 | 3120 |
| <i>L.squamaria minor</i> sequence | ..... ..... ..... ..... ..... ..... ..... ..... ..... ..... ..... ..... .....                                             |      |      |      |      |      |      |      |      |      |      |      |
|                                   | CATAGAAGTTCATTGATATCTTCTTTTATAAAGCAAATCGACTTCGATTCCTTGAATAATCCACATCACCTTCGCTTCTATTGTAAACACAAGATCCCCCTTTCTGTGGAAAAGGCCCGT  |      |      |      |      |      |      |      |      |      |      |      |
| <i>Lathraea squamaria</i>         | ..... ..... ..... ..... ..... ..... ..... ..... ..... ..... ..... ..... .....                                             |      |      |      |      |      |      |      |      |      |      |      |
|                                   | H R S S L I S S F Y K A N R L R F L N N P H H F C F Y C N T R F P F S V E K A R                                           |      |      |      |      |      |      |      |      |      |      |      |
| <i>Bartsia inaequalis</i>         | ..... ..... ..... ..... ..... ..... ..... ..... ..... ..... ..... ..... .....                                             |      |      |      |      |      |      |      |      |      |      |      |
|                                   | H R S S L I S S F Y K A N R L R F L N N P H H F C F Y C N T R F P F S V E K A R                                           |      |      |      |      |      |      |      |      |      |      |      |
|                                   | 3130                                                                                                                      | 3140 | 3150 | 3160 | 3170 | 3180 | 3190 | 3200 | 3210 | 3220 | 3230 | 3240 |
| <i>L.squamaria minor</i> sequence | ..... ..... ..... ..... ..... ..... ..... ..... ..... ..... ..... ..... .....                                             |      |      |      |      |      |      |      |      |      |      |      |
|                                   | ATCAATAATTATGATTTACGTATCGACAATTCCTCAATATCTTGTTCATTCGCAACAAAATATTTTCTTTGTGCGTCGGTAAAAAAAACATGCCTTTGGGGGGAGATATACTATTCA     |      |      |      |      |      |      |      |      |      |      |      |
| <i>Lathraea squamaria</i>         | ..... ..... ..... ..... ..... ..... ..... ..... ..... ..... ..... ..... .....                                             |      |      |      |      |      |      |      |      |      |      |      |
|                                   | I N N Y D F T Y R Q F L N I L F I R N K I F S L C V G K K K H A F G G R Y T I S                                           |      |      |      |      |      |      |      |      |      |      |      |
| <i>Bartsia inaequalis</i>         | ..... ..... ..... ..... ..... ..... ..... ..... ..... ..... ..... ..... .....                                             |      |      |      |      |      |      |      |      |      |      |      |
|                                   | I N N Y D F T Y R Q F L N I L F I R N K I F S L C V G K K K H A F G G R Y T I S                                           |      |      |      |      |      |      |      |      |      |      |      |
|                                   | 3250                                                                                                                      | 3260 | 3270 | 3280 | 3290 | 3300 | 3310 | 3320 | 3330 | 3340 | 3350 | 3360 |
| <i>L.squamaria minor</i> sequence | ..... ..... ..... ..... ..... ..... ..... ..... ..... ..... ..... ..... .....                                             |      |      |      |      |      |      |      |      |      |      |      |
|                                   | CCAATCGAGTCACAGGTATCTAACATATTCATAACTAACGATTTTCCACAAGTGGTGACGAAACGTATAACTTGTCCAATCTTTCCATTTTCCAAGTCGATCGCATCCATTCCGTTTCGT  |      |      |      |      |      |      |      |      |      |      |      |
| <i>Lathraea squamaria</i>         | ..... ..... ..... ..... ..... ..... ..... ..... ..... ..... ..... ..... .....                                             |      |      |      |      |      |      |      |      |      |      |      |
|                                   | P I E S Q V S N I F I T N D F P Q S G D E T Y N L S K S F H F P S R C D P F V R                                           |      |      |      |      |      |      |      |      |      |      |      |
| <i>Bartsia inaequalis</i>         | ..... ..... ..... ..... ..... ..... ..... ..... ..... ..... ..... ..... .....                                             |      |      |      |      |      |      |      |      |      |      |      |
|                                   | P I E S Q V S N I F I T N D F P Q S G D E T Y N L S K S F H F P S R Y D P F V R                                           |      |      |      |      |      |      |      |      |      |      |      |
|                                   | 3370                                                                                                                      | 3380 | 3390 | 3400 | 3410 | 3420 | 3430 | 3440 | 3450 | 3460 | 3470 | 3480 |
| <i>L.squamaria minor</i> sequence | ..... ..... ..... ..... ..... ..... ..... ..... ..... ..... ..... ..... .....                                             |      |      |      |      |      |      |      |      |      |      |      |
|                                   | AGAACTATTTACTCGATCGCAGACATTTCTGGAACACCTCTAACAGAGGGACAATAGTCAATTTTGAAGAAGCTTATTGTCAACCTCTTTTCAAGATATGAATCTATCTGATTCAGAAGGG |      |      |      |      |      |      |      |      |      |      |      |
| <i>Lathraea squamaria</i>         | ..... ..... ..... ..... ..... ..... ..... ..... ..... ..... ..... ..... .....                                             |      |      |      |      |      |      |      |      |      |      |      |
|                                   | R T I Y S I A D I S G T P L T E G Q I V N F E R T Y C Q P L S D M N L S D S E G                                           |      |      |      |      |      |      |      |      |      |      |      |
| <i>Bartsia inaequalis</i>         | ..... ..... ..... ..... ..... ..... ..... ..... ..... ..... ..... ..... .....                                             |      |      |      |      |      |      |      |      |      |      |      |
|                                   | R T I Y S I A D I S G T P L T E G Q I V N F E R T Y C Q P L S D M N L S D S E G                                           |      |      |      |      |      |      |      |      |      |      |      |
|                                   | 3490                                                                                                                      | 3500 | 3510 | 3520 | 3530 | 3540 | 3550 | 3560 | 3570 | 3580 | 3590 | 3600 |
| <i>L.squamaria minor</i> sequence | ..... ..... ..... ..... ..... ..... ..... ..... ..... ..... ..... ..... .....                                             |      |      |      |      |      |      |      |      |      |      |      |
|                                   | AAGAATTCATCAGTATCTCAATTCAAAACATGGGTTTGATTCCACTCCATGTTCTGAGAAATATTACCATCCtAAAAGAGCAAAAAACGGAGTCTTTGCTAAAGAAATCGCTTGAG      |      |      |      |      |      |      |      |      |      |      |      |
| <i>Lathraea squamaria</i>         | ..... ..... ..... ..... ..... ..... ..... ..... ..... ..... ..... ..... .....                                             |      |      |      |      |      |      |      |      |      |      |      |
|                                   | K N L H Q Y L N S N M G L I H T P C S E K Y L P S * K R K K R S L C L K K C V E                                           |      |      |      |      |      |      |      |      |      |      |      |
| <i>Bartsia inaequalis</i>         | ..... ..... ..... ..... ..... ..... ..... ..... ..... ..... ..... ..... .....                                             |      |      |      |      |      |      |      |      |      |      |      |
|                                   | K N L H Q Y L N S N M G L I H T P C S E K Y L P S E K R K K R S L C L K K C V E                                           |      |      |      |      |      |      |      |      |      |      |      |
|                                   | 3610                                                                                                                      | 3620 | 3630 | 3640 | 3650 | 3660 | 3670 | 3680 | 3690 | 3700 | 3710 | 3720 |
| <i>L.squamaria minor</i> sequence | ..... ..... ..... ..... ..... ..... ..... ..... ..... ..... ..... ..... .....                                             |      |      |      |      |      |      |      |      |      |      |      |
|                                   | AAAGGGCAGATGTATAGAACCTTTCAACGAGATAGTGCTTTTCAACTCTCTCAAAATGGAATCTATTCCAACATATATGCCATGGTTCCTTACTTCGACAGGGTACAAAATATCTAAAT   |      |      |      |      |      |      |      |      |      |      |      |
| <i>Lathraea squamaria</i>         | ..... ..... ..... ..... ..... ..... ..... ..... ..... ..... ..... ..... .....                                             |      |      |      |      |      |      |      |      |      |      |      |
|                                   | K G Q M Y R T F Q R D S A F S T L S K W N L F Q T Y M P W F L T S T G Y K Y L N                                           |      |      |      |      |      |      |      |      |      |      |      |
| <i>Bartsia inaequalis</i>         | ..... ..... ..... ..... ..... ..... ..... ..... ..... ..... ..... ..... .....                                             |      |      |      |      |      |      |      |      |      |      |      |
|                                   | K G Q M Y R T F Q R D S A F S T L S K W N L F Q T Y M P W F L T S T G Y K Y L N                                           |      |      |      |      |      |      |      |      |      |      |      |
|                                   | 3730                                                                                                                      | 3740 | 3750 | 3760 | 3770 | 3780 | 3790 | 3800 | 3810 | 3820 | 3830 | 3840 |
| <i>L.squamaria minor</i> sequence | ..... ..... ..... ..... ..... ..... ..... ..... ..... ..... ..... ..... .....                                             |      |      |      |      |      |      |      |      |      |      |      |
|                                   | TTGATATTTTAGATACTTTTTCAGAACTATTGCCGATACTAAGTAGCAGTCAAAAATTTgTATCCATTTTTTATGATATTATGCATGGATCAGGTATATCATGGCGAATTCCTCAGAAA   |      |      |      |      |      |      |      |      |      |      |      |
|                                   | L I F L D T F S E L L P I L S S S Q K F V S I F H D I M H T G S G I S W R I L Q K                                         |      |      |      |      |      |      |      |      |      |      |      |

*Lathraea squamaria* .....T.....  
L I F L D T F S E L L P I L S S S Q K F L S I F H D I M H G S G I S W R I L Q K  
*Bartsia inaequalis* .....  
L I F L D T F S E L L P I L S S S Q K F V S I F H D I M H G S G I S W R I L Q K

3850 3860 3870 3880 3890 3900 3910 3920 3930 3940 3950 3960  
*L.squamaria minor sequence* AAATGGTGTCTTCCACAATGGAATCTGATAAGTGAGATTTTCGAGTAAAGTGTTCACATAATCTTCTTCTGTCCGAAGAAATGATTCATCGAAATAATGAGTCACCATTTGATATCGACACAT  
*Lathraea squamaria* .....  
K W C L P Q W N L I S E I S S K C L H N L L L S E E M I H R N N E S P L I S T H  
*Bartsia inaequalis* .....  
K W C L P Q W N L I S E I S S K C L H N L L L S E E M I H R N N E S P L I S T H

3970 3980 3990 4000 4010 4020 4030 4040 4050 4060 4070 4080  
*L.squamaria minor sequence* CTGAGATCGCCAAATGTTCCGGAGTTCCTCTATTCAATCCTTTTCTTCTTTGCTGGATATCTCGTTCTGACACATCTTCTCTTTGTTTCCCGGGCCTCTAGTGAGTTACAGACA  
*Lathraea squamaria* .....  
L R S P N V R E F L Y S I L F L L L V A G Y L V R T H L L F V S R A S S E L Q T  
*Bartsia inaequalis* .....C.....  
L R S P N V R E F L Y S I L F L L L V A G Y L V R T H L L F V S R A S S E L Q P

4090 4100 4110 4120 4130 4140 4150 4160 4170 4180 4190 4200  
*L.squamaria minor sequence* GAGTTCGAAAGGGTCAAATCTTTGATGATTCCATCATCTATGACTGAGTTGCGAAACTTCTGGATAGGTATCCTACATCTGCACCGAATCTTTCTGGTTAAAGAATCTCTTCTAGTT  
*Lathraea squamaria* .....  
E F E R V K S L M I P S S M T E L R K L L D R Y P T S A P N S F W L K N L F L V  
*Bartsia inaequalis* .....  
E F E R V K S L M I P S S M T E L R K L L D R Y P T S A P N S F W L K N L F L V

4210 4220 4230 4240 4250 4260 4270 4280 4290 4300 4310 4320  
*L.squamaria minor sequence* GCTCTGGAACAATTAGGAGATTCTTTAGAAGAAATACCGGCTTCTGGCGGCAACATGCTTGGTCCCGCTTATGGGGTCAAATCAATACGTTCTAAGAAAGAAATATTTGAATATCAATCTc  
*Lathraea squamaria* .....A.....  
A L E Q L G D S L E E I R A S G G N M L G P A Y G V K S I R S K K K Y L N I N L  
*Bartsia inaequalis* .....  
A L E Q L G D S L E E I R A S G G N M L G P A Y G V K S I R S K K K Y L N I N L

4330 4340 4350 4360 4370 4380 4390 4400 4410 4420 4430 4440  
*L.squamaria minor sequence* atcgataTCATCGATCTCATACCAAAATCCCAcCAATCGAATCACTTTTTTCGAGAAATACGAGATATCTAAGTCATACAAGTAAAGAGATCTATTCAATTGATTAAGAAAAAGAAAAACGTG  
*Lathraea squamaria* .....T.....  
I D I I D L I P N P T N R I T F S R N T R Y L S H T S K E I Y S L I R K R K N V  
*Bartsia inaequalis* .....T.....  
I D L I P N P I N R I T F S R N T R Y L S H T S K E I Y S L I R K R K N V

4450 4460 4470 4480 4490 4500 4510 4520 4530 4540 4550 4560  
*L.squamaria minor sequence* AATGGGGATTGGATTGATGATAAAATcGAATCCTGGGTCCGGAACAGTGATTGCGATTGATGATGAAGAAAGAGACTTCTTGGTTTCAGTTCTCGCC~GAAAAAGGGTTGAT  
*Lathraea squamaria* .....A.....TTACCGACA.....  
N G D W I D D K I E S W V A N S D S I D D E E R D F L V Q F S A L P T E K R V D  
*Bartsia inaequalis* .....A.....TTAACGACA.....  
N G D W I D D K I E S W V A N S D S I D D E E R D F L V Q F S A L T T E K R V D



*Lathraea squamaria* S T R N I L V I A S T H I P Q K V D P A L I A P N K L N T C I K I R R L L I P Q  
*Bartsia inaequalis* S T R N I L V I A S T H I P Q K V D P A L I A P N K L N T C I K I R R L L I P Q  
S T R N I L V I A S T H I P Q K V D P A L I A P N K L N T C I K I R R L L I P Q  
5410 5420 5430 5440 5450 5460 5470 5480 5490 5500 5510 5520  
*L.squamaria minor sequence* CAACGAAAGCACTTTTTCACCTTTTCATATACTAGGGGATTTTCACCTTGAAAAGAAAATGTTCCATACTAACCGATTCCGTTCCATAACCATGGGTTCCAAATGCAAGAGATCTTGTAGCA  
*Lathraea squamaria* Q R K H F F T L S Y T R G F H L E K K M F H T N G F G S I T M G S N A R D L V A  
*Bartsia inaequalis* Q R K H F F T L S Y T R G F H L E K K M F H T N G F G S I T M G S N A R D L V A  
Q R K H F F T L S Y T R G F H L E K K M F H T N G F G S I T M G S N A R D L V A  
5530 5540 5550 5560 5570 5580 5590 5600 5610 5620 5630 5640  
*L.squamaria minor sequence* CTTACCAATGAGGCCCTATCGATTAGTATTACACAGAAGAAATCAAATCTAGACACTAATACAATAGATCCGCTTTCATAGACAAACTTGGGATTTGCGATCCAGGTAAAGATCGGTT  
*Lathraea squamaria* L T N E A L S I S I T Q K K S I L D T N T I R S A L H R Q T W D L R S Q V R S V  
*Bartsia inaequalis* L T N E A L S I S I T Q K K S I L D T N T I R S A L H R Q T W D L R S Q V R S V  
L T N E A L S I S I T Q K K S I L D T N T I R S A L H R Q T W D L R S Q V R S V  
L T N E A L S I S I T Q K K S I L D T N T I R S A L H R Q T W D L R S Q V R S V  
5650 5660 5670 5680 5690 5700 5710 5720 5730 5740 5750 5760  
*L.squamaria minor sequence* CAGGATCATGGGATCCTTTCATATCAGATAGGACGGGCTGTAGCACAAAATGTACTTCTAAGTAATTGCCCCATAGATCCATATCTATCTATATGAAGAAGAAATCATGTAACGAAAGGG  
*Lathraea squamaria* Q D H G I L S Y Q I G R A V A Q N V L L S N C P I D P I S I Y M K K K S C N E G  
*Bartsia inaequalis* Q D H G I L S Y Q I G R A V A Q N V L L S N C P I D P I S I Y M K K K S C N E G  
Q D H G I L S Y Q I G R A V A Q N V L L S N C P I D P I S I Y M K K K S C N E G  
Q D H G I L S Y Q I G R A V A Q N V L L S N C P I D P I S I Y M K K K S C N E G  
5770 5780 5790 5800 5810 5820 5830 5840 5850 5860 5870 5880  
*L.squamaria minor sequence* GATTCATTATTTGTACAAATGGTACTTCGAACCTTGGAACGAGCATGAAGAAATTAACGATACCTCTTTATCTTTAAGTTGTTCTGCCGATCGGTCGCTCAAGATCTTTGGTCTCTACCC  
*Lathraea squamaria* D S Y L Y K W Y F E L G T S M K K L T I L L Y L L S C S A G S V A Q D L W S L P  
*Bartsia inaequalis* D S Y L Y K W Y F E L G T S M K K L T I L L Y L L S C S A G S V A Q D L W S L P  
D S Y L Y K W Y F E L G T S M K K L T I L L Y L L S C S A G S V A Q D L W S L P  
D S Y L Y K W Y F E L G T S M K K L T I L L Y L L S C S A G S V A Q D L W S L P  
5890 5900 5910 5920 5930 5940 5950 5960 5970 5980 5990 6000  
*L.squamaria minor sequence* GGACCCGATGAAAAAATGGGATCACTTCTTATGGACTCGTTGAGAAATGATTCGGATCTAGTTTCATGGCCTATTAGAAGTAGAAGGCCGCTCTGGTGAGATCTTCACGGACAGAAAAGAT  
*Lathraea squamaria* G P D E K N G I T S Y G L V E N D S D L V H G L L E V E G A L V R S S R T E K D  
*Bartsia inaequalis* G P D E K N G I T S Y G L V E N D S D L V H G L L E V E G A L V R S S R T E K D  
G P D E K N G I T S Y G L V E N D S D L V H G L L E V E G A L V R S S R T E K D  
G P D E K N G I T S Y G L V E N D S D L V H G L L E V E G A L V R S S R T E K D  
6010 6020 6030 6040 6050 6060 6070 6080 6090 6100 6110 6120  
*L.squamaria minor sequence* TGCAGTCCGTTTGAAGATGATCGAGTTACATTGCTTCTCGGACCGAACCAGGAATCCCTTAGATATGATGCAAAATGGATCTTGTCTATCTTTGATCAGAGATTTCTCTATGAAAA  
*Lathraea squamaria* C S P F E N D R V T L L L R T E P R N P L D M M Q N G S C S I F D Q R F L Y E K  
*Bartsia inaequalis* C S P F E N D R V T L L L R T E P R N P L D M M Q N G S C S I F D Q R F L Y E K  
C S P F E N D R V T L L L R T E P R N P L D M M Q N G S C S I F D Q R F L Y E K  
C S P F E N D R V T L L L R T E P R N P L D M M Q N G S C S I F D Q R F L Y E K

C S P F E N D R V T L L L R P E P R N P L D M M Q N G S C S I F D Q R F L Y E K

6130 6140 6150 6160 6170 6180 6190 6200 6210 6220 6230 6240

*L.squamaria minor* sequence

TACGAATCGGAGTTTGAAGAAGGGGAGGGGAAGGAGCCCTTGACCCGCAACAGATCGAGGAGGATTTATTCAATCACATAGTTTGGGCTCCTAGAAATATGGCGCCCTTGGGCCTTTCTA  
Y E S E F E E G E G E G A L D P Q Q I E E D L F N H I V W A P R I W R P W G F L

*Lathraea squamaria*

.....  
Y E S E F E E G E G E G A L D P Q Q I E E D L F N H I V W A P R I W R P W G F L

*Bartsia inaequalis*

.....T.....  
Y E S E F E E G E G E G A L D P Q Q I E E D L F N H I V W A P R I W R P W G F L

6250 6260 6270 6280 6290 6300 6310 6320 6330 6340 6350 6360

*L.squamaria minor* sequence

TTTGATGATTGTATCGAAAGGCCCAATTCAATTGGGATTTCCCTATGGGTCCAGGTCATTTCCGGGTAAGAGGATCATTACGATGAAGGCTATGAGCTTCAGAGAAATGATTCGGAGTTC  
F D D C I E R P N S L G F P Y G S R S F R G K R I I Y D E G Y E L Q E N D S E F

*Lathraea squamaria*

.....  
F D D C I E R P N S L G F P Y G S R S F R G K R I I Y D E G Y E L Q E N D S E F

*Bartsia inaequalis*

.....GA.....C.....G.....G.....C.....  
F D D C I E N E L G F P Y G S R S F R G K R I I Y D E G D E L E E T D S E F

6370 6380 6390 6400 6410 6420 6430 6440 6450 6460 6470 6480

*L.squamaria minor* sequence

TTGCAGAGTGGAAACCATGCAGTACCAGACCGAGATAGATCTTCCAAAGAACCAAGGCCCTTTTTCGAAATAAGCCCAATTCATTTGGGACCCCTGCAGATCCGCTCTTTTTCCTATTCAAAGAT  
L Q S G T M Q Y Q T R D R S S K E Q G L F R I S Q F I W D P A D P L F F L F K D

*Lathraea squamaria*

.....  
L Q S G T M Q Y Q T R D R S S K E Q G L F R I S Q F I W D P A D P L F F L F K D

*Bartsia inaequalis*

.....  
L Q S G T M Q Y Q T R D R S S K E Q G L F R I S Q F I W D P A D P L F F L F K D

6490 6500 6510 6520 6530 6540 6550 6560 6570 6580 6590 6600

*L.squamaria minor* sequence

CAGCCCCAGGCTCTGTGTTTTCACATCGAGAATTATTTCAGATGAAGAGATGTCAAAGGGGCTTCTTACTTCCCAACAGATCCTCCTACATCTATATATAAACGCTGGTTTATCAAG  
Q P P G S V F S H R E L F A D E E M S K G L L T S Q T D P P T S I Y K R W F I K

*Lathraea squamaria*

.....  
Q P P G S V F S H R E L F A D E E M S K G L L T S Q T D P P T S I Y K R W F I K

*Bartsia inaequalis*

.....  
Q P P G S V F S H R E L F A D E E M S K G L L T S Q T D P P T S I Y K R W F I K

6610 6620 6630 6640 6650 6660 6670 6680 6690 6700 6710 6720

*L.squamaria minor* sequence

AAATACAAGAAAAGCACTTCGAGTTGTTGATTAATCGTCAGAGATGGCTT~~~~~AGTTCAATATCTAATGGATCTTCCGTTCTAATACTCTATCCGAGAGTTATCAGTATTA  
N T Q E K H F E L L I N R Q R W L S S L S N G S F R S N T L S E S Y Q Y L

*Lathraea squamaria*

.....  
N T Q E K H F E L L I N R Q R W L S S L S N G S F R S N T L S E S Y Q Y L

*Bartsia inaequalis*

.....AGAACCAAT.....  
N T Q E K H F E L L I N R Q R W L R T N S S L S N G S F R S N T L S E S Y Q Y L

6730 6740 6750 6760 6770 6780 6790 6800 6810 6820

*L.squamaria minor* sequence

TCAACTCTGTTCCCTATCTAACGGAACGCTATTGGATCAAATGACAAAGACATTTGTTAAGAAAAGATGGCTTTTCCCGGATGAAATGCAAATGGATTCATG  
S T L F L S N G T L L D Q M T K T L L R K R W L F P D E M Q I G F M

*Lathraea squamaria*

.....  
S T L F L S N G T L L D Q M T K T L L R K R W L F P D E M Q I G F M

*Bartsia inaequalis*

.....  
S T L F L S N G T L L D Q M T K T L L R K R W L F P D E M Q I G F M
