# Supplementary material for: Complete Plastid Genome of the Recent Holoparasite Lathraea squamaria Reveals Earliest Stages of Plastome Reduction in Orobanchaceae
Source: PubMed Central journal article supplement (PMC4775063; doi:10.1371/journal.pone.0150718), 2016-03-02

S1 Figure. Analysis of *rpoC1*, *rpoC2*, and *rbcL* cDNAs. a: Electrophoresis of results of cDNA amplification showing transcription and/or splicing of plastid genes (lanes 1-3 – *rpoC1*, fruits; 4-6 – *rpoC1*, perianth; 7-11 – *rpoC2*; 12-17 – *rbcL*). b: Chromatogram showing polymorphism in *rbcL* cDNA and DNA (T/C, marked by asterisks).

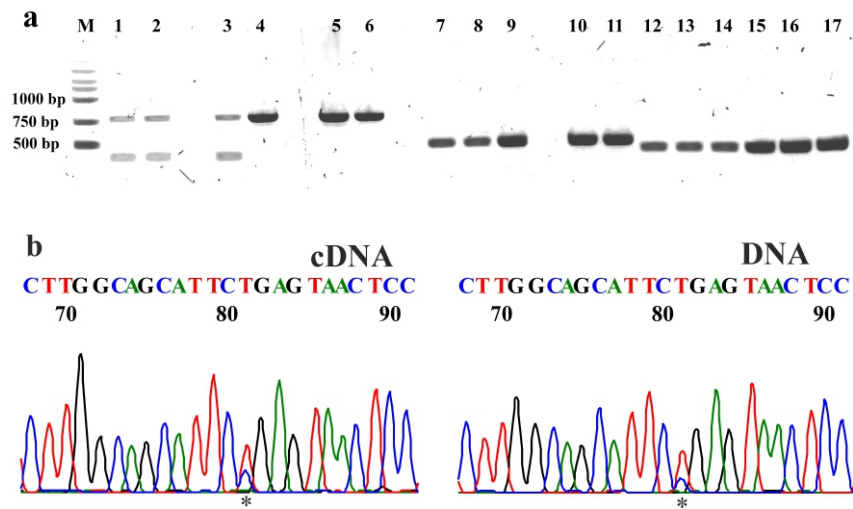

Supplement: pone.0150718.s002.pdf [file pone.0150718.s002.pdf]
