# Supplementary material for: Complete Plastid Genome of the Recent Holoparasite Lathraea squamaria Reveals Earliest Stages of Plastome Reduction in Orobanchaceae
Source: PubMed Central journal article supplement (PMC4775063; doi:10.1371/journal.pone.0150718), 2016-03-02
Supplement: pone.0150718.s003.pdf [file pone.0150718.s003.pdf]

S2 Figure. Estimated ages in million years and 95% highest posterior density (HPD) intervals

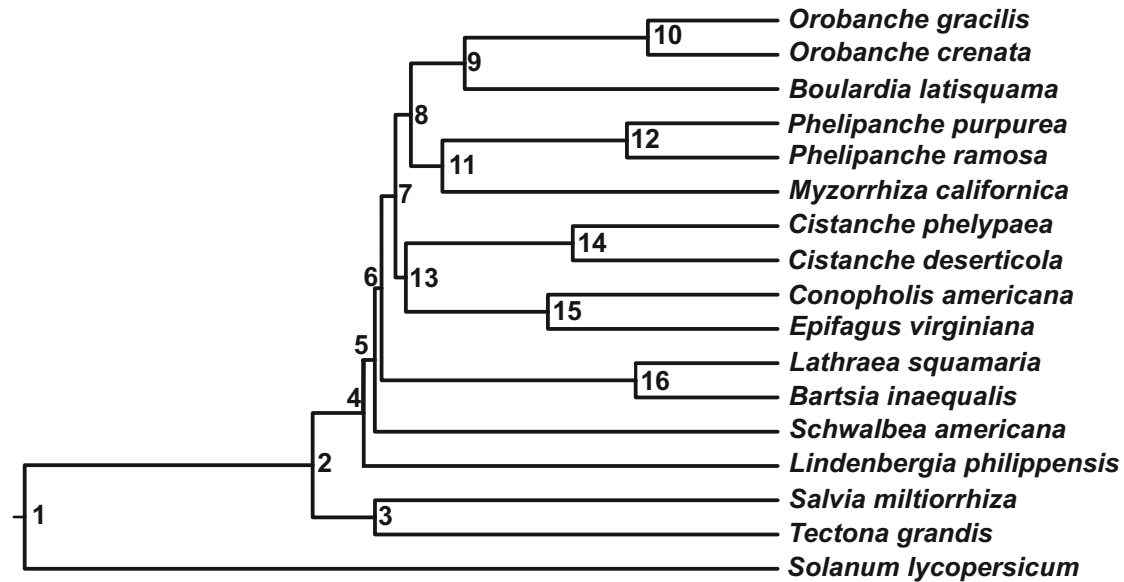

| node | estimated age | 95% HPD       |
|------|---------------|---------------|
| 1    | 96.69         | 94.89 - 99.75 |
| 2    | 45.46         | 43.10 - 50.21 |
| 3    | 39.37         | 31.67 - 45.12 |
| 4    | 40.46         | 37.67 - 44.79 |
| 5    | 39.38         | 36.54 - 43.58 |
| 6    | 38.72         | 35.86 - 42.87 |
| 7    | 37.36         | 34.45 - 41.47 |
| 8    | 35.85         | 32.85 - 39.90 |
| 9    | 30.59         | 26.45 - 34.90 |
| 10   | 12.69         | 08.92 - 17.21 |
| 11   | 32.77         | 29.33 - 36.84 |
| 12   | 14.73         | 10.80 - 19.14 |
| 13   | 36.34         | 33.29 - 40.43 |
| 14   | 20.03         | 13.70 - 26.55 |
| 15   | 22.45         | 16.99 - 28.04 |
| 16   | 13.89         | 08.17 - 21.59 |
