# Supplementary material for: Complete Plastid Genome of the Recent Holoparasite Lathraea squamaria Reveals Earliest Stages of Plastome Reduction in Orobanchaceae
Source: PubMed Central journal article supplement (PMC4775063; doi:10.1371/journal.pone.0150718), 2016-03-02
Supplement: pone.0150718.s004.pdf [file pone.0150718.s004.pdf]

S1 Table. Primers used for plastome assembly and cDNA amplification.

| Name             | Sequence                      | Localization  | Purpose            |
|------------------|-------------------------------|---------------|--------------------|
| Lsqua-C11-F      | AGTAGGATTCGACAATGGGTTTGA      | 20808-20831   | PCR                |
| Lsqua-C28-R      | TGTTGGGACTGGGTTAGAACGACA      | 25292-25315   | PCR                |
| Lsqua-C28-F      | ATTTCTCTTTGCCAAGGAGAAGATGC    | 35600-35625   | PCR                |
| Lsqua-C14-R      | CAATTATGAAGCGTGGCTAAGTGAT     | 40496-40520   | PCR                |
| Lsqua-14-F       | CGATAGCACCTTGATCAGTTAATTCAA   | 53597-53623   | PCR                |
| Lsqua-C5-R       | GAACTCCCAATTCTCTAGCAAAT       | 55051-55073   | PCR                |
| Lsqua-C5-F       | CCTCCATACTGAGATATACCATAAGAC   | 69210-69236   | PCR                |
| Lsqua-C23-R      | ACAGCAACCCTAGTCGCCATAT        | 72473-72494   | PCR                |
| Lsqua-C25-F      | GGGAGATATACTATTTACCAATCG      | 87390-87414   | PCR                |
| Lsqua-C18-R      | CATCTCGATCGGAAAAGAATCAAGAG    | 94690-94715   | PCR                |
| Lsqua-C18-F      | TGTAGTGACGAATCTTGTATGTGTTT    | 97283-97308   | PCR                |
| Lsqua-C16-R      | GAACGCTCCCCTACCGATGTAT        | 103008-103029 | PCR                |
| Lsqua-C16-F      | GGATACTAATTGGCAAGAATTTGAAC    | 108013-108038 | PCR                |
| Lsqua-C7-R       | GGACAAAATTCTAAACGCCTTA        | 108394-108415 | PCR                |
| Lat3-intern-R    | TCAATTTATCTCTCTCAACTTGGGA     | 54750-54773   | sequencing         |
| Lat4-intern-F    | TTGGTTCTACCATATTTTTCATTTTATCC | 70210-70238   | sequencing         |
| Lat4-intern1-F   | CTAGAACCACCTAAAGTTCCAATAA     | 72269-72294   | sequencing         |
| Lat6-intern-R    | CGTTAGCTACAGCACTGCAC          | 98686-98705   | sequencing         |
| rbcL:54293U21    | CCACAAACAGAGACTAAAGCA         | 54313-54333   | cDNA amplification |
| rbcL:54646L22    | GAATCCAAATACGTTTCCTACA        | 54666-54687   | cDNA amplification |
| rpoC2:17330U21   | TTGAACGCACTTCTAACACCT         | 17350-17370   | cDNA amplification |
| rpoC2:17789L22   | TACCGTTTAATCACTCATAACC        | 17809-17830   | cDNA amplification |
| rpoC1:22354U21   | GGATAAATCTAGATCGGCTAA         | 22374-22394   | cDNA amplification |
| rpoC1:23444L20   | GAAGATATCAGATGGGCTAC          | 23464-23483   | cDNA amplification |
| Lsqua-LSC-IRa-F  | AATTGTATGGCCGATCATTGTG        | 81864-81885   | PCR                |
| Lsqua- LSC-IRa-R | GTTATCCTGCACTCGGAAGAA         | 150329-150349 | PCR                |
| Lsqua-IRa-SSC-F  | ACTGAGTAACTTGTTCAAGAATCG      | 108100-108124 | PCR                |
| Lsqua- IRa-SSC-R | GTTGGCTCAATTAACGGAGTTT        | 108288-108309 | PCR                |
| Lsqua- SSC-IRb-F | CTCCCAATTGTTCTAACTCCGTT       | 124154-124179 | PCR                |
| Lsqua-IRb-LSC-R  | TATATAAATCATCGTAACGAAGATGAT   | 141-167       | PCR                |
| Lath:63862U22F   | CAAATATATCATAAGCTAAACC        | 63862-63884   | PCR                |
| Lath:64410L21    | AATTAAACCTAACACGATTCC         | 64410-64431   | PCR                |
