# Supplementary material for: Complete Plastid Genome of the Recent Holoparasite Lathraea squamaria Reveals Earliest Stages of Plastome Reduction in Orobanchaceae
Source: PubMed Central journal article supplement (PMC4775063; doi:10.1371/journal.pone.0150718), 2016-03-02
Supplement: pone.0150718.s005.pdf [file pone.0150718.s005.pdf]

S2 Table. Genes encoded in the *Lathraea squamaria* and *Lindenbergia philippensis* plastomes.

<sup>a</sup> containing one intron, <sup>b</sup> containing two introns, <sup>c</sup> genes in the IR regions (i.e., duplicated),  
\*pseudogenes

| Functional category                   | Group of genes               | <i>Lathraea squamaria</i>                                                                                                                                                                                                                                                                                                                                                                                                                    | <i>Lindenbergia philippensis</i>                                                                                                                                                                                                                                                                                                                                                                                                             |
|---------------------------------------|------------------------------|----------------------------------------------------------------------------------------------------------------------------------------------------------------------------------------------------------------------------------------------------------------------------------------------------------------------------------------------------------------------------------------------------------------------------------------------|----------------------------------------------------------------------------------------------------------------------------------------------------------------------------------------------------------------------------------------------------------------------------------------------------------------------------------------------------------------------------------------------------------------------------------------------|
| Protein synthesis and DNA-replication | rRNA genes                   | <i>rrn16<sup>c</sup>, rrn23<sup>c</sup>, rrn4.5<sup>c</sup>, rrn5<sup>c</sup></i>                                                                                                                                                                                                                                                                                                                                                            | <i>rrn16<sup>c</sup>, rrn23<sup>c</sup>, rrn4.5<sup>c</sup>, rrn5<sup>c</sup>,</i>                                                                                                                                                                                                                                                                                                                                                           |
|                                       | tRNA genes                   | <i>trnA-UGC<sup>ac</sup>, trnC-GCA, trnD-GUC, trnE-UUC, trnH-GUG, trnF-GAA, trnG-GCC, trnG-UCC<sup>a</sup>, trnI-GAU<sup>ac</sup>, trnI-CAU<sup>c</sup>, trnK-UUU<sup>a</sup>, trnL-CAA<sup>c</sup>, trnL-UAA<sup>a</sup>, trnL-UAG, trnfM-CAU, trnM-CAU, trnN-GUU<sup>c</sup>, trnP-UGG, trnQ-UUG, trnR-ACG<sup>c</sup>, trnR-UCU, trnS-GCU, trnS-GGA, trnS-GCU, trnT-GGU, trnT-UGU, trnV-GAC<sup>c</sup>, trnV-UAC, trnW-CCA, trnY-GUA</i> | <i>trnA-UGC<sup>ac</sup>, trnC-GCA, trnD-GUC, trnE-UUC, trnH-GUG, trnF-GAA, trnG-GCC, trnG-UCC<sup>a</sup>, trnI-GAU<sup>ac</sup>, trnI-CAU<sup>c</sup>, trnK-UUU<sup>a</sup>, trnL-CAA<sup>c</sup>, trnL-UAA<sup>a</sup>, trnL-UAG, trnfM-CAU, trnM-CAU, trnN-GUU<sup>c</sup>, trnP-UGG, trnQ-UUG, trnR-ACG<sup>c</sup>, trnR-UCU, trnS-GCU, trnS-GGA, trnS-GCU, trnT-GGU, trnT-UGU, trnV-GAC<sup>c</sup>, trnV-UAC, trnW-CCA, trnY-GUA</i> |
|                                       | Ribosomal small subunit      | <i>rps2, rps3, rps4, rps7<sup>c</sup>, rps8, rps11, rps12_5'end, rps12_3'end<sup>ac</sup>, rps14, rps15, rps16<sup>a</sup>, rps18, rps19*</i>                                                                                                                                                                                                                                                                                                | <i>rps2, rps3, rps4, rps7<sup>c</sup>, rps8, rps11, rps12_5'end, rps12_3'end<sup>ac</sup>, rps14, rps15, rps16<sup>a</sup>, rps18, rps19</i>                                                                                                                                                                                                                                                                                                 |
|                                       | Ribosomal large subunit      | <i>rpl2<sup>ac</sup>, rpl14, rpl16<sup>a</sup>, rpl20, rpl22, rpl23<sup>c</sup>, rpl32, rpl33, rpl36</i>                                                                                                                                                                                                                                                                                                                                     | <i>rpl2<sup>ac</sup>, rpl14, rpl16<sup>a</sup>, rpl20, rpl22, rpl23<sup>c</sup>, rpl32, rpl33, rpl36</i>                                                                                                                                                                                                                                                                                                                                     |
|                                       | DNA-dependent RNA polymerase | <i>rpoA*, rpoB, rpoC1<sup>a</sup>, rpoC2*</i>                                                                                                                                                                                                                                                                                                                                                                                                | <i>rpoA, rpoB, rpoC1<sup>a</sup>, rpoC2</i>                                                                                                                                                                                                                                                                                                                                                                                                  |
| Photosynthesis                        | Large subunit of rubisco     | <i>rbcL*</i>                                                                                                                                                                                                                                                                                                                                                                                                                                 | <i>rbcL</i>                                                                                                                                                                                                                                                                                                                                                                                                                                  |
|                                       | Photosystem I                | <i>psaA*, psaB*, psaC, psal, psaj*</i>                                                                                                                                                                                                                                                                                                                                                                                                       | <i>psaA, psaB, psaC, psal, psaj</i>                                                                                                                                                                                                                                                                                                                                                                                                          |
|                                       | Photosystem II               | <i>psbA*, psbB*, psbC*, psbD*, psbE, psbF, psbH*, psbI*, psbJ*, psbK, psbL, psbM, psbN, psbT*, psbZ</i>                                                                                                                                                                                                                                                                                                                                      | <i>psbA, psbB, psbC, psbD, psbE, psbF, psbH, psbI, psbJ, psbK, psbL, psbM, psbN, psbT, psbZ</i>                                                                                                                                                                                                                                                                                                                                              |
|                                       | NADH                         | <i>ndhA*, ndhB<sup>c</sup>, ndhC, ndhD*</i>                                                                                                                                                                                                                                                                                                                                                                                                  | <i>ndhA ndhJ, ndhK, ndhC,</i>                                                                                                                                                                                                                                                                                                                                                                                                                |

|       |                                              |                                                                                                                                                                                  |                                                                                                                |
|-------|----------------------------------------------|----------------------------------------------------------------------------------------------------------------------------------------------------------------------------------|----------------------------------------------------------------------------------------------------------------|
|       | dehydrogenase                                | <i>ndhE</i> , <i>ndhF</i> <sup>*</sup> , <i>ndhG</i> <sup>*</sup> , <i>ndhH</i> <sup>*</sup> ,<br><i>ndhI</i> <sup>*</sup> , <i>ndhJ</i> <sup>*</sup> , <i>ndhK</i> <sup>*</sup> | <i>ndhB</i> <sup>ac</sup> , <i>ndhF</i> , <i>ndhI</i> ,<br><i>ndhH</i> , <i>ndhD</i> <i>ndhE</i> , <i>ndhG</i> |
|       | Cytochrome b/f complex                       | <i>petA</i> <sup>*</sup> , <i>petB</i> <sup>*</sup> , <i>petD</i> <sup>*</sup> , <i>petG</i> <sup>*</sup> ,<br><i>petN</i>                                                       | <i>petA</i> , <i>petB</i> <sup>a</sup> , <i>petD</i> <sup>a</sup> , <i>petG</i> ,<br><i>petL</i> , <i>petN</i> |
|       | ATP synthase                                 | <i>atpA</i> , <i>atpB</i> , <i>atpE</i> , <i>atpF</i> <sup>a</sup> , <i>atpH</i> ,<br><i>atpI</i>                                                                                | <i>atpA</i> , <i>atpB</i> , <i>atpE</i> , <i>atpF</i> <sup>a</sup> ,<br><i>atpH</i> , <i>atpI</i>              |
| Other | Maturase                                     | <i>matK</i>                                                                                                                                                                      | <i>matK</i>                                                                                                    |
|       | Subunit of acetyl-CoA carboxylase            | <i>accD</i>                                                                                                                                                                      | <i>accD</i>                                                                                                    |
|       | Membrane protein                             | <i>cemA</i> <sup>*</sup>                                                                                                                                                         | <i>cemA</i>                                                                                                    |
|       | Protease                                     | <i>clpP</i> <sup>b</sup>                                                                                                                                                         | <i>clpP</i> <sup>b</sup>                                                                                       |
|       | Translational initiation factor              | <i>infA</i>                                                                                                                                                                      | <i>infA</i>                                                                                                    |
|       | c-type cytochrome synthesis                  | <i>ccsA</i> <sup>*</sup>                                                                                                                                                         | <i>ccsA</i>                                                                                                    |
|       | Conserved open reading frames ( <i>ycf</i> ) | <i>ycf1</i> , <i>ycf1</i> <sup>*</sup> , <i>ycf2</i> <sup>c</sup> , <i>ycf3</i> <sup>b</sup> , <i>ycf4</i> <sup>*</sup>                                                          | <i>ycf1</i> , <i>ycf1</i> <sup>*</sup> , <i>ycf2</i> <sup>c</sup> , <i>ycf3</i> <sup>b</sup> ,<br><i>ycf4</i>  |
